# Supplementary material for: Effects of Nickel, Chlorpyrifos and Their Mixture on the Dictyostelium discoideum Proteome
Source: MDPI journal article supplement (doi:10.3390/ijms131215679), 2012-11-23

## **Supplemental information - Blast2GO analysis**

### **Methods**

The fasta sequences of the proteins were downloaded from <http://www.ncbi.nlm.nih.gov> using the GI code.

Data analysis was performed with Blast2GO using standard parameters. To obtain the pie charts of biological process and molecular function distribution - under the different experimental conditions - the proteins were classified with GO terms and two different cut-off levels – 2, 3 were applied.

The data obtained with cut-off level = 3 are very poorly informative. We reported only the pie charts obtained with cut-off level 2.

All the proteins comigrating in a single spot were considered for the Blast2GO analysis.

**Results**

Nickel EC25 – proteins up regulated – 2 proteins

**biological\_process Level 2**

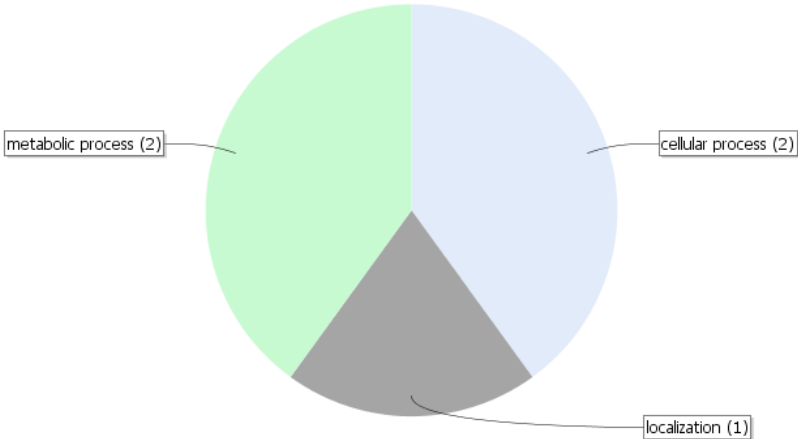

**molecular\_function Level 2**

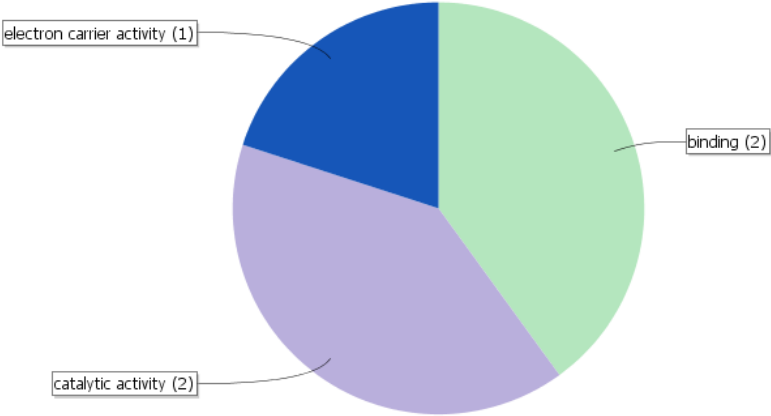

Nickel EC25 – proteins down regulated – 14 proteins

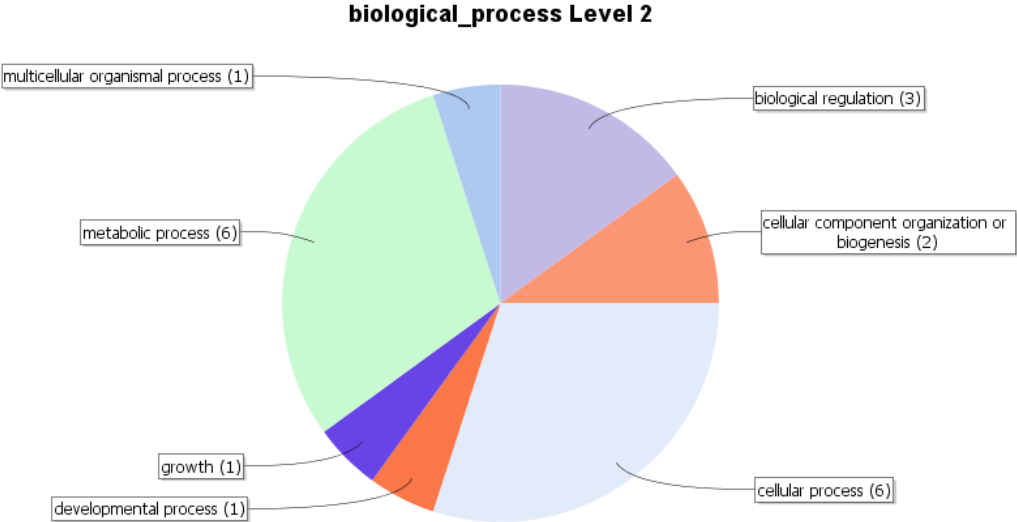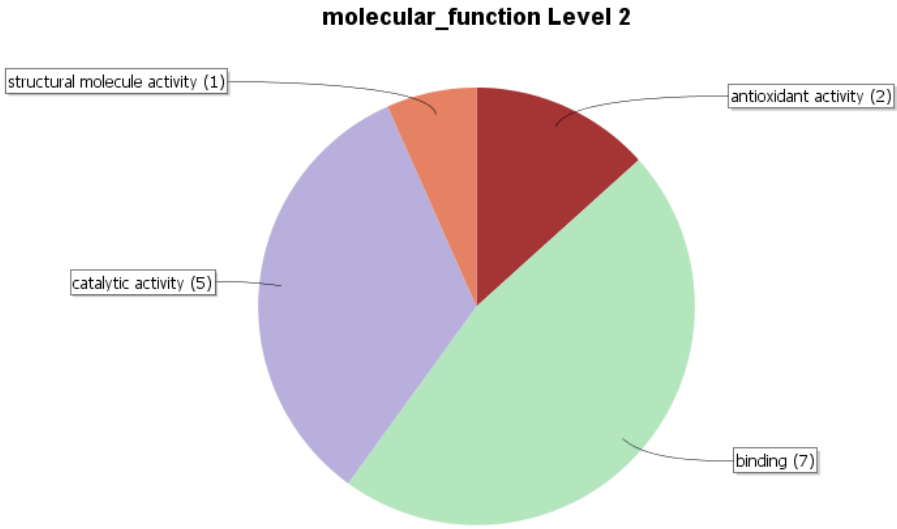

Nickel EC50 – proteins up regulated – 6 proteins

**biological\_process Level 2**

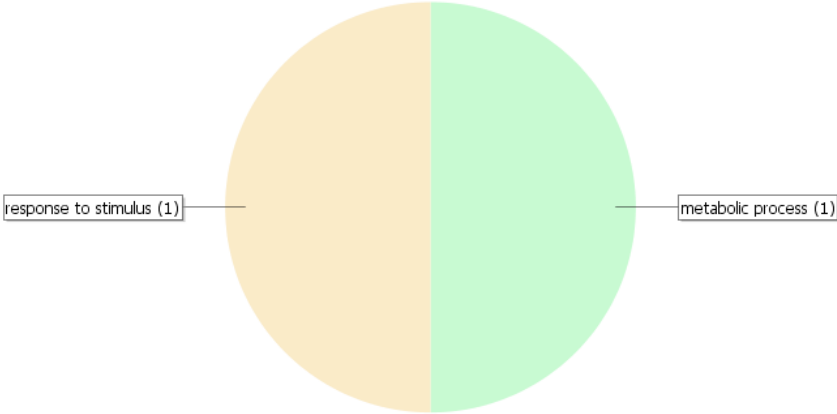

**molecular\_function Level 2**

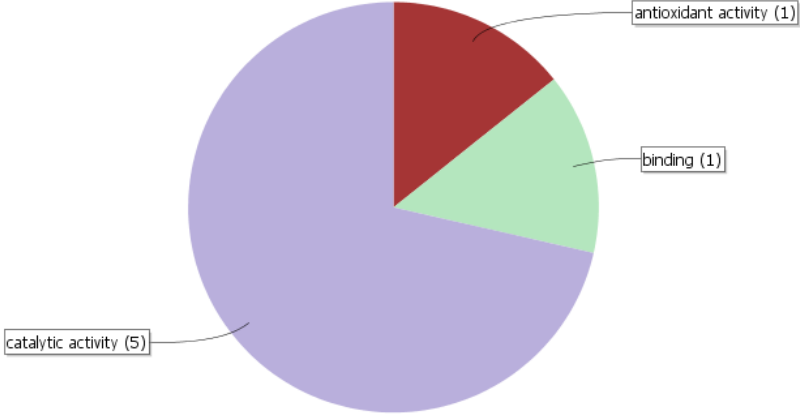

Nickel EC50 – proteins down regulated – 12 proteins

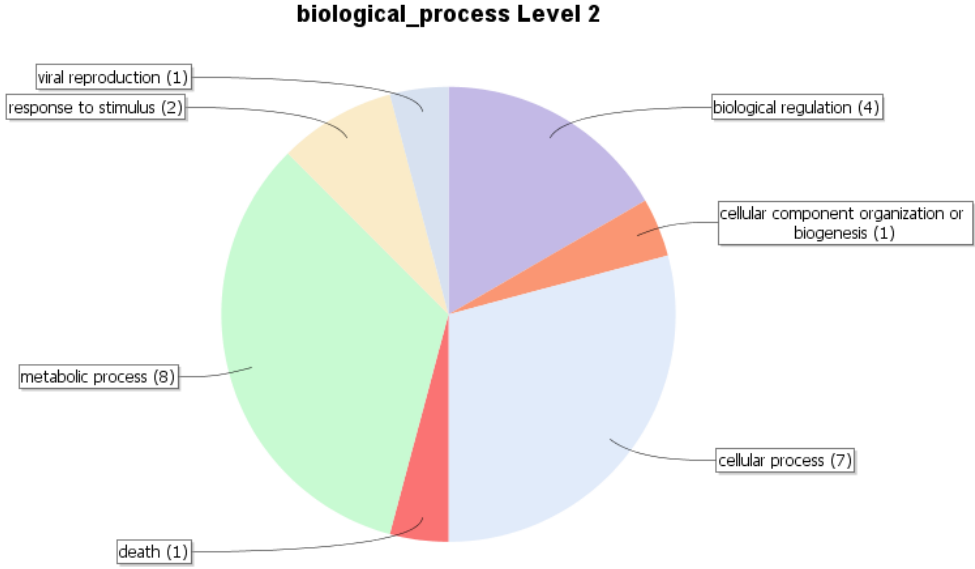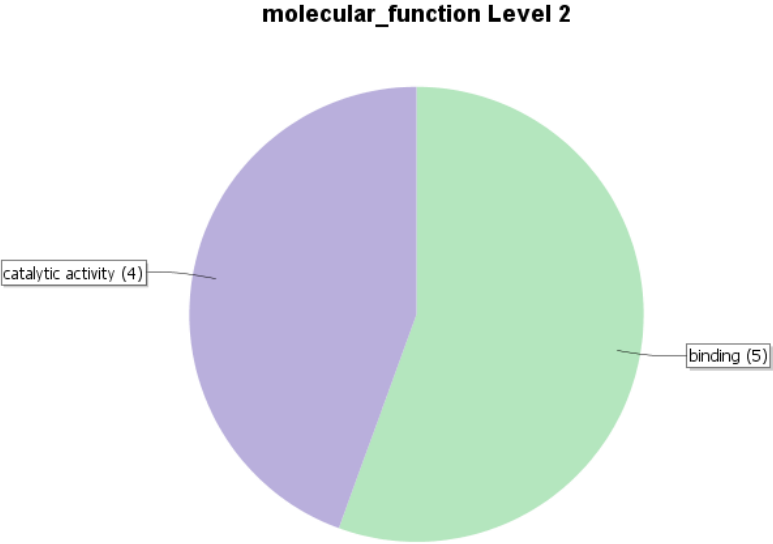

Chlorpyrifos EC25 – proteins down regulated – 6 proteins

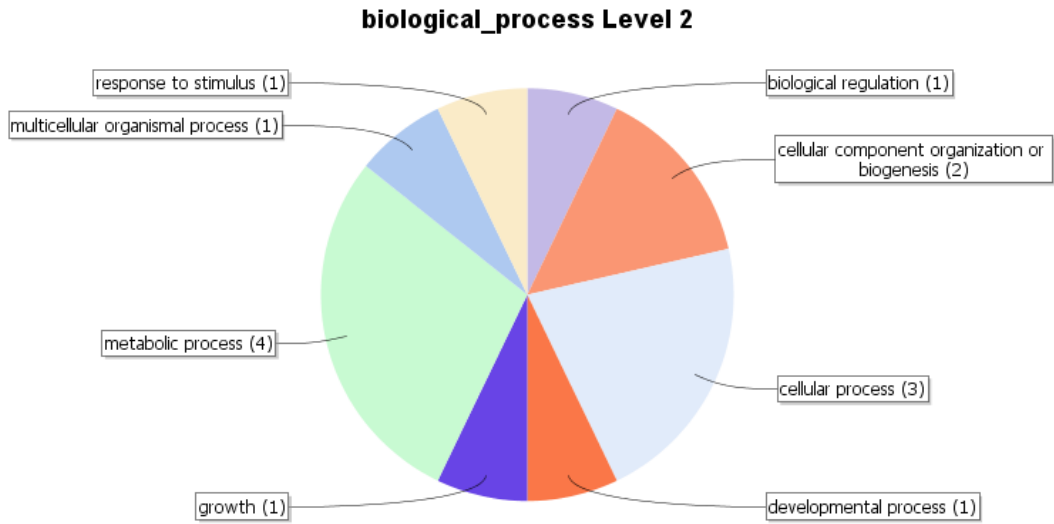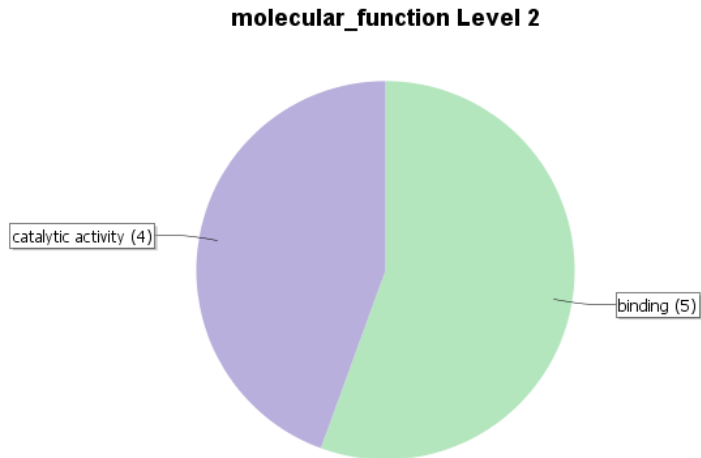

Chlorpyrifos EC50 – proteins up regulated – 8 proteins

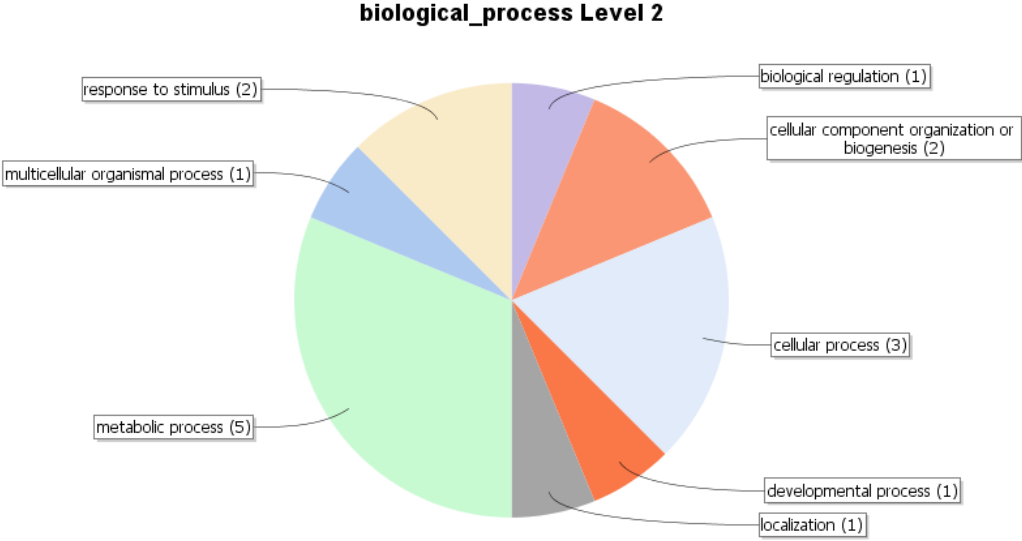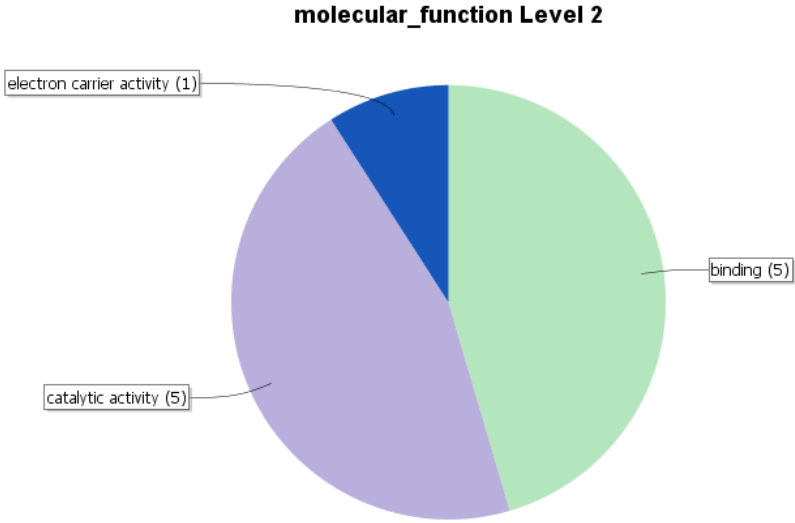

Chlorpyrifos EC50 – proteins down regulated – 5 proteins

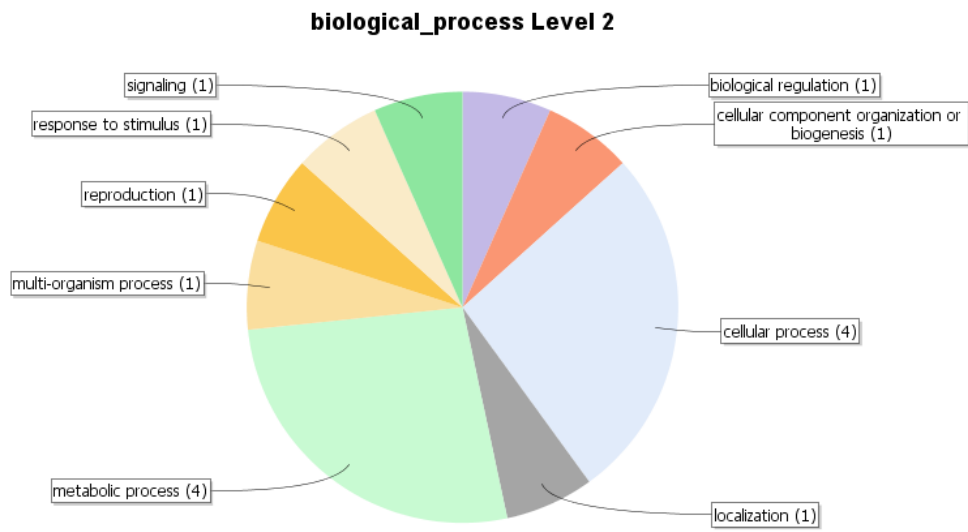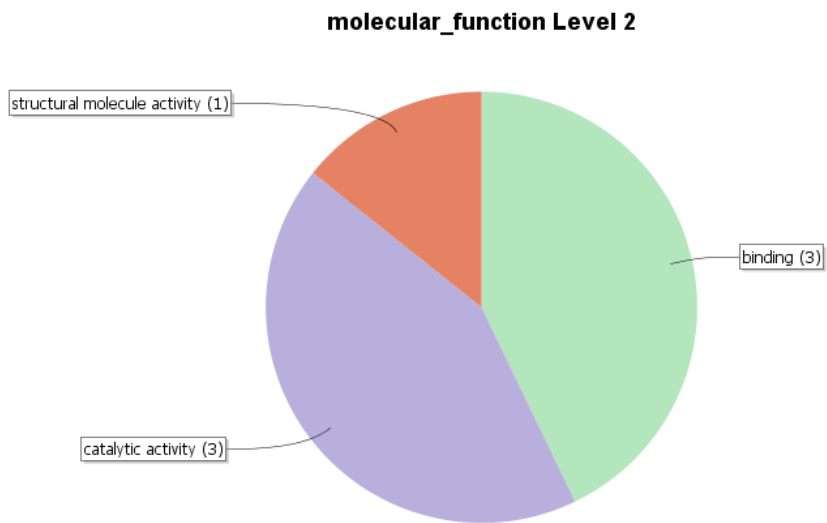



Mixture - proteins up regulated – 6 proteins

**biological\_process Level 2**

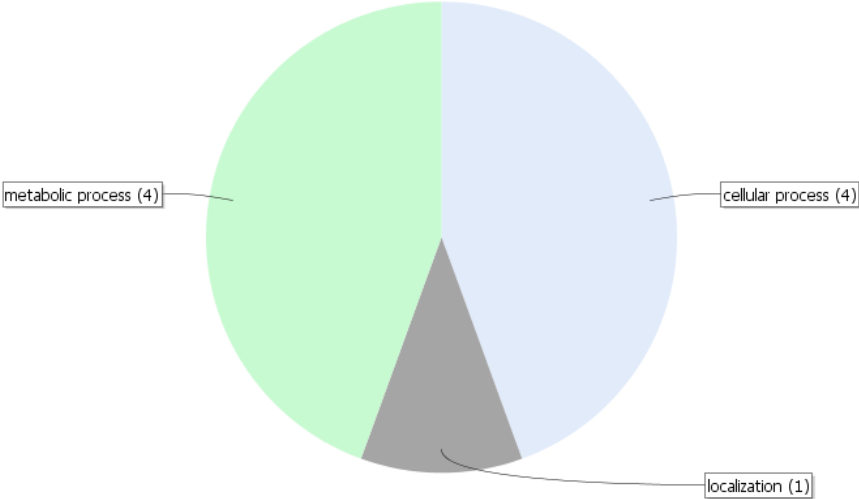

**molecular\_function Level 2**

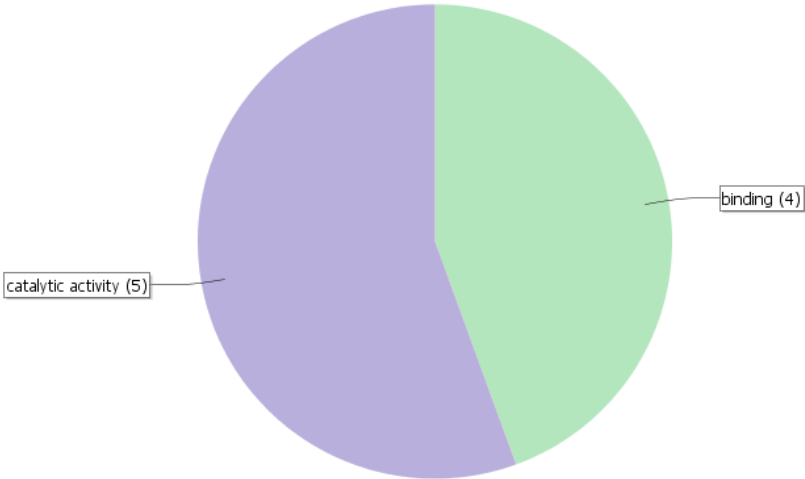

Mixture - proteins down regulated – 12 proteins

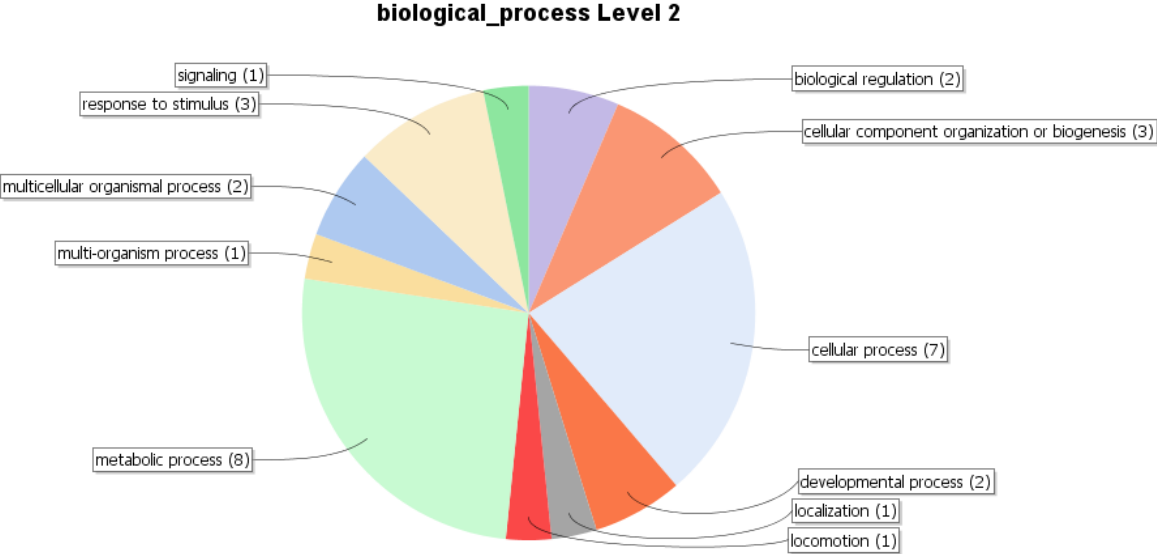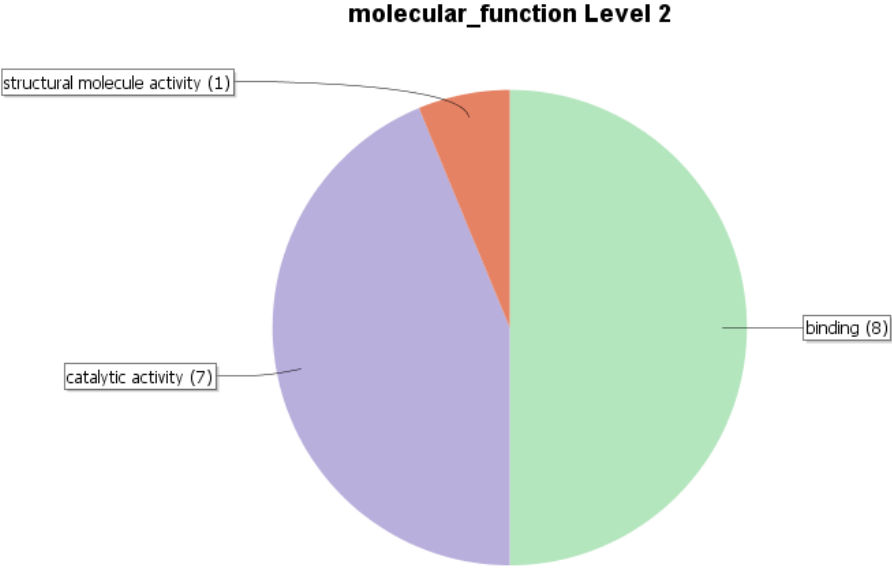

Supplement: s3 [file s3]
