# Supplementary material for: Effects of Nickel, Chlorpyrifos and Their Mixture on the Dictyostelium discoideum Proteome
Source: MDPI journal article supplement (doi:10.3390/ijms131215679), 2012-11-23

**Supplemental Figure 2.** Typical 2-DE gel of the proteins extracted from *Dictyostelium discoideum* amoebae. This pattern was highly reproducible, similar results being obtained in 7 different biological replicates for each treatment (see also Supplemental Table 2).

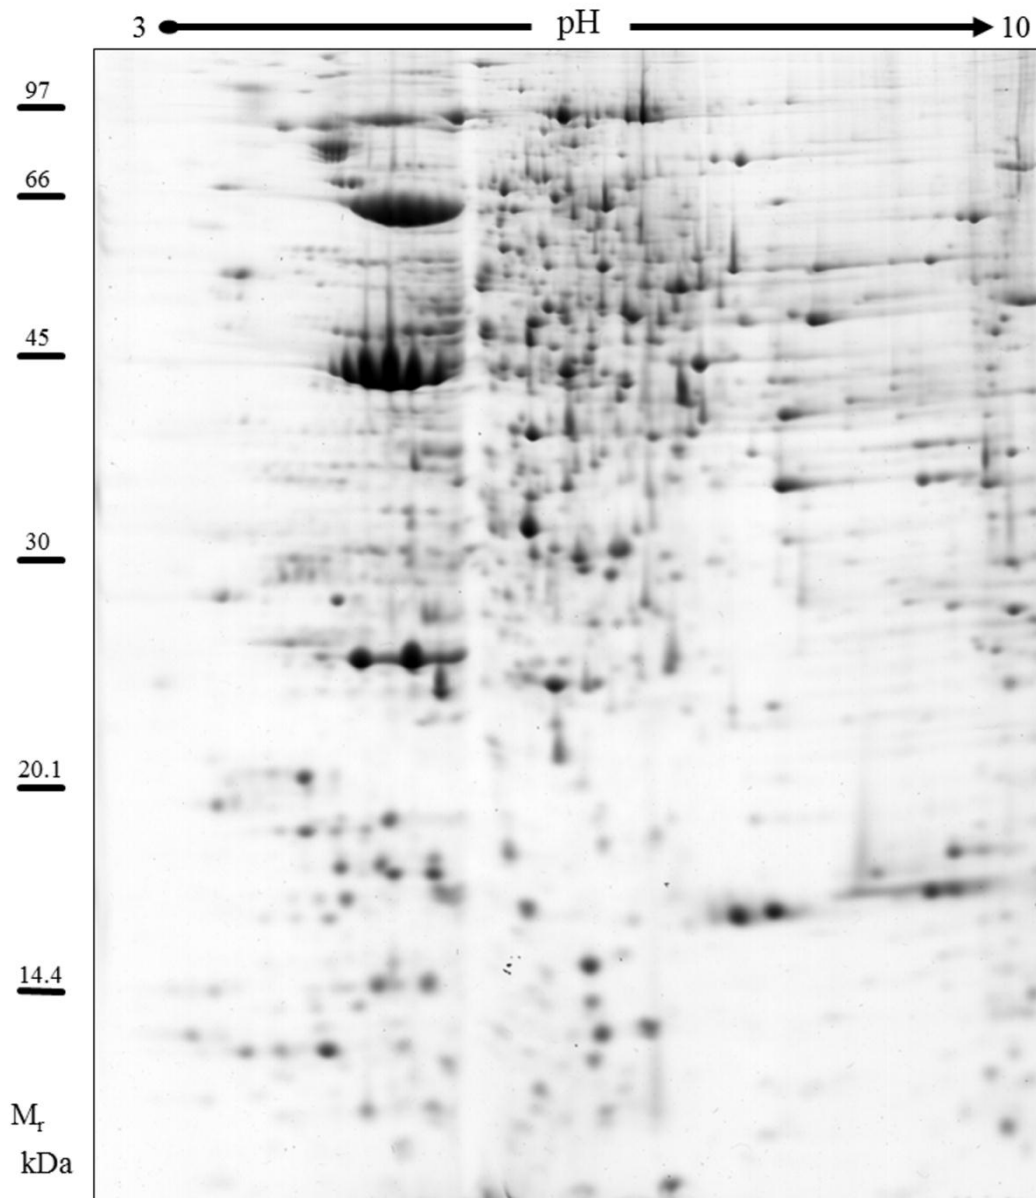

Supplement: s2 [file s2]
