# Supplementary material for: Effects of Nickel, Chlorpyrifos and Their Mixture on the Dictyostelium discoideum Proteome
Source: Int J Mol Sci. 2012 Nov 23;13(12):15679–705. doi: 10.3390/ijms131215679 (PMC3546656; doi:10.3390/ijms131215679)
Supplement: Supplementary file 5 [file ijms-13-15679-s005.pdf]

## PDQuest vs 7.3.1 Software - Matching Summary

| Treatment            | Information                         | Control gels |      |      |     |      |     |     | Treated gels |     |     |      |      |      |     |
|----------------------|-------------------------------------|--------------|------|------|-----|------|-----|-----|--------------|-----|-----|------|------|------|-----|
|                      |                                     | 1            | 2    | 3    | 4   | 5    | 6   | 7   | 1            | 2   | 3   | 4    | 5    | 6    | 7   |
| Nickel<br>EC25       | n° spot x gel                       | 496          | 492  | 499  | 495 | 491  | 497 | 482 | 492          | 493 | 495 | 491  | 487  | 496  | 487 |
|                      | n° matched spots vs. member gel (%) | 98%          | 98%  | 97%  | 98% | 98%  | 98% | 95% | 97%          | 97% | 98% | 98%  | 99%  | 98%  | 98% |
|                      | n° matched spots vs. master gel (%) | 96%          | 94%  | 95%  | 93% | 93%  | 95% | 95% | 97%          | 97% | 95% | 93%  | 93%  | 85%  | 95% |
|                      | n° spots matched to every member    | 481          |      |      |     |      |     |     |              |     |     |      |      |      |     |
| Nickel<br>EC50       | n° spot x gel                       | 483          | 473  | 468  | 461 | 481  | 475 | 471 | 488          | 493 | 467 | 454  | 478  | 484  | 472 |
|                      | n° matched spots vs. member gel (%) | 97%          | 100% | 99%  | 97% | 97%  | 98% | 97% | 95%          | 94% | 99% | 100% | 96%  | 97%  | 97% |
|                      | n° matched spots vs. master gel (%) | 99%          | 100% | 98%  | 95% | 97%  | 97% | 96% | 98%          | 98% | 98% | 89%  | 96%  | 95%  | 97% |
|                      | n° spots matched to every member    | 450          |      |      |     |      |     |     |              |     |     |      |      |      |     |
| Chlorpyrifos<br>EC25 | n° spot x gel                       | 496          | 492  | 499  | 495 | 491  | 497 | 482 | 491          | 501 | 486 | 493  | 487  | 485  | 491 |
|                      | n° matched spots vs. member gel (%) | 98%          | 98%  | 97%  | 98% | 98%  | 98% | 95% | 98%          | 87% | 98% | 98%  | 97%  | 96%  | 97% |
|                      | n° matched spots vs. master gel (%) | 96%          | 94%  | 95%  | 93% | 93%  | 95% | 95% | 93%          | 95% | 96% | 94%  | 87%  | 100% | 96% |
|                      | n° spots matched to every member    | 481          |      |      |     |      |     |     |              |     |     |      |      |      |     |
| Chlorpyrifos<br>EC50 | n° spot x gel                       | 572          | 575  | 576  | 573 | 564  | 573 | 568 | 571          | 574 | 575 | 570  | 544  | 572  | 573 |
|                      | n° matched spots vs. member gel (%) | 98%          | 100% | 100% | 99% | 100% | 98% | 97% | 100%         | 99% | 99% | 100% | 99%  | 97%  | 98% |
|                      | n° matched spots vs. master gel (%) | 96%          | 99%  | 99%  | 99% | 98%  | 98% | 96% | 94%          | 98% | 99% | 100% | 99%  | 97%  | 96% |
|                      | n° spots matched to every member    | 526          |      |      |     |      |     |     |              |     |     |      |      |      |     |
| Mixture              | n° spot x gel                       | 466          | 481  | 473  | 469 | 468  | 472 | 475 | 489          | 469 | 465 | 467  | 473  | 468  | 471 |
|                      | n° matched spots vs. member gel (%) | 98%          | 96%  | 98%  | 98% | 98%  | 98% | 97% | 99%          | 98% | 98% | 98%  | 100% | 98%  | 98% |
|                      | n° matched spots vs. master gel (%) | 96%          | 97%  | 97%  | 96% | 96%  | 97% | 97% | 98%          | 96% | 95% | 97%  | 97%  | 96%  | 96% |
|                      | n° spots matched to every member    | 458          |      |      |     |      |     |     |              |     |     |      |      |      |     |
